# Supplementary material for: Nanostructured Pt-doped 2D MoSe2: an efficient bifunctional electrocatalyst for both hydrogen evolution and oxygen reduction reactions
Source: Royal Society of Chemistry journal article supplement (doi:10.1039/d2cp00924b), 2022-01-01
Supplement: d2cp00924b1.pdf [file d2cp00924b1.pdf]

# Supplementary Information

## Nanostructured Pt-Doped 2D MoSe<sub>2</sub>: An Efficient Bifunctional Electrocatalyst for both Hydrogen Evolution and Oxygen Reduction Reactions

Shrish Nath Upadhyay<sup>1</sup> and Srimanta Pakhira<sup>1, 2, 3\*</sup>

<sup>1</sup> Department of Metallurgical Engineering and Materials Science (MEMS), Indian Institute of Technology Indore (IIT Indore), Khandwa Road, Simrol, Indore-453552, MP, India.

<sup>2</sup> Department of Physics, Indian Institute of Technology Indore, Khandwa Road, Simrol, Indore-453552, MP, India.

<sup>3</sup> Centre for Advanced Electronics (CAE), Indian Institute of Technology Indore, Khandwa Road, Simrol, Indore-453552, MP, India.

\*Corresponding author: [spakhira@iiti.ac.in](mailto:spakhira@iiti.ac.in) (or) [spakhirafsu@gmail.com](mailto:spakhirafsu@gmail.com)

### Periodic Calculations:

#### 1. 2D Monolayer Pristine MoSe<sub>2</sub>:

|                           |            |
|---------------------------|------------|
| _chemical_name_common     | 'BG_MoSe2' |
| _cell_length_a            | 3.234700   |
| _cell_length_b            | 3.234700   |
| _cell_length_c            | 20.000000  |
| _cell_angle_alpha         | 90.000000  |
| _cell_angle_beta          | 90.000000  |
| _cell_angle_gamma         | 120.000000 |
| _cell_volume              | 181.229393 |
| _space_group_name_H-M_alt | 'P -6 m 2' |

\_space\_group\_IT\_number

187

loop\_

\_space\_group\_symop\_operation\_xyz

'x, y, z'  
'-y, x-y, z'  
'-x+y, -x, z'  
'x, y, -z'  
'-y, x-y, -z'  
'-x+y, -x, -z'  
'-y, -x, z'  
'-x+y, y, z'  
'x, x-y, z'  
'-y, -x, -z'  
'-x+y, y, -z'  
'x, x-y, -z'

loop\_

\_atom\_site\_label

\_atom\_site\_occupancy

\_atom\_site\_fract\_x

\_atom\_site\_fract\_y

\_atom\_site\_fract\_z

\_atom\_site\_adp\_type

\_atom\_site\_U\_iso\_or\_equiv

\_atom\_site\_type\_symbol

|       |     |           |          |           |
|-------|-----|-----------|----------|-----------|
| MO001 | 1.0 | 0.000000  | 0.000000 | 0.000000  |
| SE002 | 1.0 | -0.333333 | 0.333333 | -0.082650 |

## 2. Pt-MoSe<sub>2</sub> 2D Monolayer:

\_chemical\_name\_common

'BG\_Pt\_MoSe2.out'

\_cell\_length\_a

6.738619

\_cell\_length\_b

6.739656

\_cell\_length\_c

20.000000

\_cell\_angle\_alpha

90.000000

```

_cell_angle_beta          90.000000
_cell_angle_gamma        120.000000
_cell_volume              786.627723
_space_group_name_H-M_alt 'P 1'
_space_group_IT_number    1

```

```

loop_
_space_group_symop_operation_xyz
  'x, y, z'

```

```

loop_
  _atom_site_label
  _atom_site_occupancy
  _atom_site_fract_x
  _atom_site_fract_y
  _atom_site_fract_z
  _atom_site_adp_type
  _atom_site_U_iso_or_equiv
  _atom_site_type_symbol
MO001      1.0      0.008906      -0.008846      0.083631
SE002      1.0      0.344751       0.168236      0.002489
SE003      1.0      0.344755       0.168173      0.164785
MO004      1.0      0.004106       0.493562      0.083636
SE005      1.0      0.318097      -0.318049     -0.003679
SE006      1.0      0.318175      -0.318120      0.170922
MO007      1.0     -0.493493     -0.004101      0.083636
SE008      1.0     -0.156610       0.156763      0.002685
SE009      1.0     -0.156601       0.156750      0.164582
SE010      1.0     -0.168829     -0.345020      0.002547
SE011      1.0     -0.168726     -0.344985      0.164738
PT012      1.0      0.472110     -0.471004      0.083596

```

## Finite Non-periodic Molecular Cluster Model Systems with their Equilibrium Structures

### 1. Hydrogen Evolution Reaction (HER) on MoSe<sub>2</sub>:

#### (i) [MoSe<sub>2</sub>]

|    |             |             |             |
|----|-------------|-------------|-------------|
| Mo | -0.18984100 | 0.00445200  | -0.13167900 |
| Se | -0.25439600 | -0.27754200 | 2.29221800  |
| Mo | 2.12028100  | 0.00108000  | 1.37411900  |
| Se | 2.92413500  | 0.08026200  | 3.82022100  |
| Mo | 5.37956700  | 0.03187600  | 3.06236700  |
| Se | 6.01045700  | -0.10728100 | 5.54609800  |
| Mo | 7.94729200  | 0.05773000  | 4.07836500  |
| Se | -0.37372500 | -0.34069300 | -2.51365800 |
| Se | 1.37078100  | 1.87719900  | -0.18660900 |
| Se | 1.36948600  | -1.88561500 | -0.16371400 |
| Mo | 2.10974500  | 0.02996900  | -1.75832100 |
| Se | 4.11457300  | 1.66919900  | 1.50224000  |
| Se | 4.16221200  | -1.56985000 | 1.45425500  |
| Mo | 5.03888200  | 0.09213600  | -0.27437800 |
| Se | 7.05290800  | 1.91535600  | 2.75062600  |
| Se | 7.08535900  | -1.83142300 | 2.76995100  |
| Mo | 7.99907900  | 0.04577200  | 1.31807300  |
| Se | 2.41764700  | 0.64322100  | -4.20182900 |
| Se | 3.98983600  | 1.78948400  | -1.83523600 |
| Se | 4.00822300  | -1.62222200 | -1.83401700 |
| Mo | 4.79889300  | 0.04318300  | -3.54860100 |
| Se | 7.02209800  | 1.68406500  | -0.43850900 |
| Se | 6.98342200  | -1.55400600 | -0.42882800 |
| Mo | 7.68291900  | 0.02995900  | -2.33755700 |
| Se | 10.04928200 | -0.08670100 | 2.85641900  |
| Se | 5.04947700  | -0.31158700 | -6.13264900 |
| Se | 6.51921300  | 1.90462900  | -3.61960100 |
| Se | 6.56915500  | -1.85958300 | -3.63046100 |
| Mo | 7.17779600  | 0.04300400  | -5.04990000 |
| Se | 9.63484300  | 0.11383200  | -0.65788100 |
| Se | 9.44411300  | -0.22054500 | -4.18249600 |

#### (ii) [MoSe<sub>2</sub>]<sup>-</sup>

|    |             |             |            |
|----|-------------|-------------|------------|
| Mo | -0.26783400 | -0.00992700 | 0.01730500 |
| Se | -0.27286400 | -0.01384600 | 2.44960500 |
| Mo | 2.09841300  | -0.00279300 | 1.42860300 |
| Se | 2.94712900  | -0.00318600 | 3.84007900 |
| Mo | 5.38276400  | 0.00813800  | 3.04631600 |
| Se | 6.00806400  | 0.00565300  | 5.54756600 |
| Mo | 7.94214700  | 0.01689400  | 4.07252900 |

|    |             |             |             |
|----|-------------|-------------|-------------|
| Se | -0.58290200 | -0.00769100 | -2.39501600 |
| Se | 1.30390200  | 1.88048200  | -0.08076600 |
| Se | 1.31889800  | -1.88731300 | -0.08704200 |
| Mo | 1.89813400  | 0.00172300  | -1.68925600 |
| Se | 4.12447800  | 1.61958500  | 1.45048700  |
| Se | 4.13819200  | -1.60819900 | 1.44437300  |
| Mo | 5.00974000  | 0.01277100  | -0.32210200 |
| Se | 7.05701200  | 1.89990800  | 2.75841700  |
| Se | 7.07249600  | -1.86843300 | 2.75131200  |
| Mo | 7.98414600  | 0.02221300  | 1.31659500  |
| Se | 2.42678700  | 0.00844700  | -4.19287300 |
| Se | 3.90711400  | 1.62246000  | -1.96472100 |
| Se | 3.92053700  | -1.60038400 | -1.97009800 |
| Mo | 4.93820200  | 0.01879300  | -3.72384600 |
| Se | 6.97206500  | 1.63489200  | -0.44755100 |
| Se | 6.98565200  | -1.59245200 | -0.45368000 |
| Mo | 7.73890900  | 0.02772600  | -2.33797200 |
| Se | 10.05032100 | 0.02734400  | 2.85827300  |
| Se | 5.24119300  | 0.02525200  | -6.28770700 |
| Se | 6.63790100  | 1.91015900  | -3.64607700 |
| Se | 6.65273700  | -1.85899500 | -3.65232100 |
| Mo | 7.34504300  | 0.03068900  | -5.06650900 |
| Se | 9.64340000  | 0.03131700  | -0.62976500 |
| Se | 9.59194000  | 0.03813100  | -4.13513100 |

**(iii)[MoSe<sub>2</sub>]H<sub>Se</sub>**

|    |             |             |            |
|----|-------------|-------------|------------|
| Mo | -0.27824100 | 0.00970200  | 0.01745000 |
| Se | -0.26556500 | -0.04677000 | 2.45044500 |
| Mo | 2.08732100  | 0.00535400  | 1.42116700 |
| Se | 2.93408300  | 0.03846000  | 3.82876200 |
| Mo | 5.36808100  | 0.00973200  | 3.04228700 |

|    |             |             |             |
|----|-------------|-------------|-------------|
| Se | 5.95443200  | -0.09375900 | 5.53407100  |
| Mo | 7.90515000  | 0.00701500  | 4.08946400  |
| Se | -0.57477900 | -0.04184400 | -2.39885600 |
| Se | 1.30018200  | 1.89151000  | -0.07904100 |
| Se | 1.29659100  | -1.87516900 | -0.08755600 |
| Mo | 1.88734200  | 0.01371400  | -1.68108100 |
| Se | 4.11749800  | 1.62359100  | 1.44257800  |
| Se | 4.13149000  | -1.59243800 | 1.42407300  |
| Mo | 5.03105000  | 0.02751600  | -0.32478800 |
| Se | 7.04212100  | 1.90383700  | 2.77293000  |
| Se | 7.04886800  | -1.86681000 | 2.74148600  |
| Mo | 7.97062300  | 0.03515300  | 1.34722400  |
| Se | 2.41603100  | 0.06787500  | -4.18207400 |
| Se | 3.90088300  | 1.63163200  | -1.95294200 |
| Se | 3.91326600  | -1.58179400 | -1.95238700 |
| Mo | 4.92159200  | 0.02494400  | -3.71649300 |
| Se | 6.97511300  | 1.67627400  | -0.44736900 |
| Se | 7.04416300  | -1.57548500 | -0.45847200 |
| Mo | 7.72169000  | 0.04005600  | -2.36627900 |
| Se | 10.00868800 | -0.14791000 | 2.83242900  |
| Se | 5.18977000  | -0.08638100 | -6.26729500 |
| Se | 6.62132600  | 1.91641000  | -3.65625100 |
| Se | 6.62458800  | -1.85464700 | -3.64116900 |
| Mo | 7.30391800  | 0.02429100  | -5.07830700 |
| Se | 9.73968000  | 0.35111000  | -0.63527300 |
| Se | 9.54947400  | -0.16040200 | -4.10473400 |
| H  | 10.39448800 | -0.96829700 | -0.67167000 |

**(iv) [MoSe<sub>2</sub>]H<sub>Se</sub>**

|    |             |            |            |
|----|-------------|------------|------------|
| Mo | -0.27801200 | 0.00342900 | 0.01799600 |
|----|-------------|------------|------------|

|    |             |             |             |
|----|-------------|-------------|-------------|
| Se | -0.27574900 | -0.00718000 | 2.44857600  |
| Mo | 2.09073000  | 0.00203000  | 1.41931300  |
| Se | 2.93408800  | -0.00027400 | 3.82691000  |
| Mo | 5.36615600  | 0.00476700  | 3.04204300  |
| Se | 5.95945200  | -0.03511500 | 5.54641000  |
| Mo | 7.90273700  | -0.00254100 | 4.09641700  |
| Se | -0.58693100 | -0.00053300 | -2.39324800 |
| Se | 1.29771400  | 1.89465600  | -0.08032000 |
| Se | 1.29904600  | -1.88694600 | -0.08639000 |
| Mo | 1.89070800  | 0.00718700  | -1.68001200 |
| Se | 4.12114900  | 1.61593900  | 1.44060000  |
| Se | 4.13106900  | -1.60209300 | 1.42777800  |
| Mo | 5.03595900  | 0.01383000  | -0.32558900 |
| Se | 7.04273200  | 1.90342600  | 2.77851200  |
| Se | 7.04957900  | -1.87863400 | 2.73994500  |
| Mo | 7.97355700  | 0.03117500  | 1.35224600  |
| Se | 2.41381600  | 0.01327900  | -4.17908700 |
| Se | 3.90358900  | 1.62006600  | -1.95553300 |
| Se | 3.91334100  | -1.59473300 | -1.95503200 |
| Mo | 4.92036700  | 0.01581400  | -3.71785500 |
| Se | 6.98850200  | 1.66614900  | -0.44884300 |
| Se | 7.05687600  | -1.58197100 | -0.45944700 |
| Mo | 7.72305800  | 0.03797300  | -2.37226700 |
| Se | 10.01546900 | -0.06549500 | 2.85641900  |
| Se | 5.19061400  | -0.01923600 | -6.28131600 |
| Se | 6.61918100  | 1.91461900  | -3.66480400 |
| Se | 6.63029300  | -1.86826900 | -3.63827000 |
| Mo | 7.30011800  | 0.01241800  | -5.08621000 |
| Se | 9.74449200  | 0.29386900  | -0.63417900 |
| Se | 9.55475000  | -0.05279800 | -4.13082000 |
| H  | 10.35247000 | -1.04833700 | -0.66161300 |

**(v) TS1**

|    |             |             |             |
|----|-------------|-------------|-------------|
| Mo | 5.21357800  | -0.84673400 | -0.00113800 |
| Se | 5.01144600  | -3.26403300 | -0.03183000 |
| Mo | 2.72508100  | -2.03260500 | -0.01408500 |
| Se | 1.66846900  | -4.34407800 | -0.05759400 |
| Mo | -0.70590300 | -3.32779400 | -0.01849200 |
| Se | -1.55266500 | -5.75155200 | 0.03720600  |
| Mo | -3.33440700 | -4.08478600 | -0.03086500 |
| Se | 5.78489300  | 1.50859300  | -0.00718000 |
| Se | 3.65726300  | -0.58097100 | -1.88382400 |
| Se | 3.65360400  | -0.60548500 | 1.88060500  |
| Mo | 3.22204700  | 1.06270200  | 0.01257700  |
| Se | 0.69350600  | -1.83530300 | -1.61718500 |
| Se | 0.69913300  | -1.86729600 | 1.59682400  |
| Mo | -0.00635700 | -0.00329800 | 0.00869500  |
| Se | -2.36362600 | -2.82807000 | -1.90768500 |
| Se | -2.35397900 | -2.88551100 | 1.88298500  |
| Mo | -3.09123200 | -1.32620900 | 0.00735200  |
| Se | 2.95755000  | 3.58466100  | 0.07376600  |
| Se | 1.23951600  | 1.53589500  | -1.59007900 |
| Se | 1.24174500  | 1.51931600  | 1.62884600  |
| Mo | 0.38133000  | 3.37157900  | 0.02398400  |
| Se | -1.94171600 | 0.33704700  | -1.62032200 |
| Se | -1.93436500 | 0.29128900  | 1.65100300  |
| Mo | -2.51158700 | 2.24320900  | 0.03765700  |
| Se | -5.30492000 | -2.69266300 | 0.05444300  |
| Se | 0.37443500  | 5.93785600  | -0.10399100 |
| Se | -1.32772700 | 3.48434800  | -1.87088600 |
| Se | -1.34083100 | 3.44822300  | 1.93086200  |
| Mo | -1.84587500 | 4.94421400  | 0.05126900  |
| Se | -4.64706200 | 0.67358000  | -0.06986700 |
| Se | -4.15401400 | 4.28054400  | -0.10289400 |
| H  | -4.02267500 | 1.81109900  | 1.07905300  |

**(vi) [MoSe<sub>2</sub>]H<sub>Mo</sub>**

|    |             |             |             |
|----|-------------|-------------|-------------|
| Mo | -0.24340400 | -0.01756000 | -0.00064000 |
| Se | -0.27509600 | 0.07304300  | 2.42651700  |
| Mo | 2.11551400  | -0.00044100 | 1.42078500  |
| Se | 2.94288300  | 0.00712300  | 3.82789200  |
| Mo | 5.40186500  | 0.01161300  | 3.03712200  |
| Se | 6.01596200  | 0.03332600  | 5.53096600  |
| Mo | 7.95447800  | 0.04249100  | 4.04065500  |
| Se | -0.59152600 | 0.13162300  | -2.38842200 |
| Se | 1.31901400  | 1.87617400  | -0.09613500 |
| Se | 1.34565600  | -1.88284500 | -0.10989400 |



|    |             |             |             |
|----|-------------|-------------|-------------|
| Mo | 1.92883200  | -0.00523700 | -1.71264100 |
| Se | 4.15526500  | 1.59652100  | 1.41406300  |
| Se | 4.14966000  | -1.62056200 | 1.45566500  |
| Mo | 5.02958500  | -0.03733300 | -0.33716600 |
| Se | 7.08496700  | 1.90482800  | 2.69816600  |
| Se | 7.09905700  | -1.87132200 | 2.76002500  |
| Mo | 7.97867600  | 0.00090000  | 1.26834400  |
| Se | 2.37260400  | -0.20044700 | -4.19540700 |
| Se | 3.94147500  | 1.59697100  | -1.96515600 |
| Se | 3.92814600  | -1.64479200 | -1.97728200 |
| Mo | 4.91584300  | 0.00470000  | -3.73447000 |
| Se | 6.98011100  | 1.59061400  | -0.50436400 |
| Se | 6.98966600  | -1.67393600 | -0.44234400 |
| Mo | 7.70093700  | -0.08003500 | -2.36386200 |
| Se | 10.06208800 | -0.00042000 | 2.89019900  |
| Se | 5.11312000  | 0.31815300  | -6.26969500 |
| Se | 6.66671600  | 1.87625500  | -3.71217000 |
| Se | 6.60803500  | -1.92183300 | -3.68938500 |
| Mo | 7.24709100  | -0.05337400 | -5.13689800 |
| Se | 9.64093900  | 0.11768300  | -0.56113100 |
| Se | 9.48342000  | 0.19926900  | -4.31456700 |
| H  | 8.83719000  | -1.37382700 | -2.42119200 |

**(vii) [MoSe<sub>2</sub>]H<sub>Mo</sub>H<sub>Se</sub>**

|    |             |             |             |
|----|-------------|-------------|-------------|
| Mo | -0.26023000 | -0.02654400 | 0.00641200  |
| Se | -0.29417800 | 0.01574700  | 2.45065900  |
| Mo | 2.06587600  | 0.00034900  | 1.46553600  |
| Se | 2.89118200  | 0.06833800  | 3.90874400  |
| Mo | 5.31118700  | 0.02692000  | 3.14320900  |
| Se | 5.92082800  | -0.13433600 | 5.64445900  |
| Mo | 7.85677100  | 0.05563800  | 4.19975800  |
| Se | -0.53415000 | 0.05112700  | -2.39531200 |
| Se | 1.30072300  | 1.86923600  | -0.06606900 |
| Se | 1.33360400  | -1.89084400 | -0.06793000 |
| Mo | 1.94876400  | -0.01206600 | -1.65267800 |
| Se | 4.09141100  | 1.61656300  | 1.49880300  |
| Se | 4.10979500  | -1.59884700 | 1.52235500  |
| Mo | 5.03950500  | -0.00446800 | -0.23072300 |
| Se | 6.99060500  | 1.91208700  | 2.84684400  |

|    |             |             |             |
|----|-------------|-------------|-------------|
| Se | 6.98690900  | -1.84412200 | 2.90436700  |
| Mo | 7.93056600  | 0.01888600  | 1.45925900  |
| Se | 2.47168200  | -0.15169100 | -4.11676800 |
| Se | 3.95598200  | 1.61046700  | -1.88224400 |
| Se | 3.97420000  | -1.62458400 | -1.88399600 |
| Mo | 5.00874600  | 0.02274000  | -3.61272800 |
| Se | 6.95634400  | 1.65441600  | -0.34968400 |
| Se | 7.03093500  | -1.62825800 | -0.29896600 |
| Mo | 7.76238600  | -0.02187700 | -2.19970100 |
| Se | 9.94156700  | -0.35400000 | 2.98017400  |
| Se | 5.22983000  | 0.31325800  | -6.12840600 |
| Se | 6.73105600  | 1.91966100  | -3.57300200 |
| Se | 6.72200700  | -1.88841400 | -3.52254600 |
| Mo | 7.35657000  | -0.01736300 | -4.97055800 |
| Se | 9.73683100  | 0.48372100  | -0.40669800 |
| Se | 9.56727300  | 0.28777000  | -4.10802800 |
| H  | 8.92002500  | -1.29078400 | -2.23434600 |
| H  | 10.51574300 | -0.76078000 | -0.28431000 |

**(viii) TS2**

|    |             |             |             |
|----|-------------|-------------|-------------|
| Mo | 5.39045000  | 0.10875300  | 0.07553700  |
| Se | 5.54515500  | -2.32860700 | 0.19804200  |
| Mo | 3.15439600  | -1.48718200 | -0.05089000 |
| Se | 2.50584400  | -3.97400300 | -0.30685000 |
| Mo | 0.04425200  | -3.36343100 | -0.24277600 |
| Se | -0.39009000 | -5.89251300 | -0.10812400 |
| Mo | -2.41545700 | -4.60129000 | -0.39120600 |
| Se | 5.47611300  | 2.53344800  | 0.24752000  |
| Se | 3.88596200  | 0.13467200  | -1.85908400 |
| Se | 3.74657500  | 0.03440600  | 1.89853400  |
| Mo | 3.08836100  | 1.62381100  | 0.04095900  |

|    |             |             |             |
|----|-------------|-------------|-------------|
| Se | 1.20482300  | -1.61091800 | -1.76477100 |
| Se | 1.07472900  | -1.71960400 | 1.47078000  |
| Mo | 0.10062600  | 0.00402700  | -0.12805700 |
| Se | -1.58756600 | -3.13489000 | -2.18020900 |
| Se | -1.70331900 | -3.32413600 | 1.58398700  |
| Mo | -2.67775500 | -1.87501700 | -0.27853600 |
| Se | 2.34116800  | 4.05690700  | 0.08244500  |
| Se | 1.11925100  | 1.76709000  | -1.65630600 |
| Se | 0.99576500  | 1.68701000  | 1.56465300  |
| Mo | -0.13832100 | 3.37090800  | -0.06003800 |
| Se | -1.77377700 | 0.04509900  | -1.82752300 |
| Se | -1.92640400 | -0.10875300 | 1.41667500  |
| Mo | -2.82267100 | 1.77596400  | -0.13569400 |
| Se | -4.58142100 | -3.51935400 | 0.08068300  |
| Se | -0.55183700 | 5.86658600  | -0.29993800 |
| Se | -1.78619400 | 3.21393000  | -1.99138200 |
| Se | -1.89157900 | 3.14845300  | 1.78514000  |
| Mo | -2.59654600 | 4.55651600  | -0.09013100 |
| Se | -4.60683100 | -0.16864700 | -0.90756100 |
| Se | -4.72882200 | 3.56723100  | -0.56304300 |
| H  | -4.17402500 | 1.66254100  | 1.12894300  |
| H  | -4.27647300 | 1.34619300  | 2.00310200  |
| O  | -4.55448100 | 0.95165700  | 3.18249900  |
| H  | -4.51385900 | -0.06714300 | 3.24959100  |
| H  | -5.44138500 | 1.23593300  | 3.43785200  |
| O  | -4.36369800 | -1.59642800 | 3.42856100  |
| H  | -3.47721300 | -1.76344200 | 3.83025800  |
| H  | -4.43532000 | -2.17798800 | 2.66043000  |
| O  | -1.84243200 | -1.77960000 | 4.42243800  |
| H  | -1.59658900 | -2.28476700 | 5.20259200  |
| H  | -1.44132900 | -0.89407500 | 4.53214100  |

|   |             |             |            |
|---|-------------|-------------|------------|
| O | -0.77274500 | 0.78519900  | 4.49145700 |
| H | -0.05374500 | 0.98111600  | 3.87435000 |
| H | -0.64431000 | 1.38051600  | 5.23649700 |
| H | -5.52354000 | -0.34982300 | 0.23473500 |

**(ix) [MoSe<sub>2</sub>]HSe<sup>+</sup>**

|    |             |             |             |
|----|-------------|-------------|-------------|
| Mo | -0.27153400 | 0.06097300  | 0.01427700  |
| Se | -0.21775500 | -0.23733900 | 2.44025000  |
| Mo | 2.09645100  | 0.03844600  | 1.42110500  |
| Se | 2.95125100  | 0.21738500  | 3.85087000  |
| Mo | 5.34769200  | 0.02780700  | 3.01413000  |
| Se | 5.99169200  | -0.26019500 | 5.48321700  |
| Mo | 7.91468900  | 0.00831600  | 4.03665400  |
| Se | -0.52142800 | -0.25412700 | -2.39634700 |
| Se | 1.32100200  | 1.92176700  | -0.08538900 |
| Se | 1.28298700  | -1.83900900 | -0.08225000 |
| Mo | 1.90099000  | 0.04034700  | -1.68078300 |
| Se | 4.10614300  | 1.68545900  | 1.44821100  |
| Se | 4.11469900  | -1.56054300 | 1.40572300  |
| Mo | 5.00346100  | 0.08580300  | -0.32280500 |
| Se | 7.03632600  | 1.89604200  | 2.73353400  |
| Se | 7.00785900  | -1.86435500 | 2.73449600  |
| Mo | 7.94005500  | 0.01922900  | 1.29856700  |
| Se | 2.43037900  | 0.24017100  | -4.19993600 |
| Se | 3.89044100  | 1.69000900  | -1.95878100 |
| Se | 3.90299300  | -1.55623200 | -1.92925800 |
| Mo | 4.91058800  | 0.03667600  | -3.68264600 |
| Se | 6.93768900  | 1.71573600  | -0.44461400 |
| Se | 6.96500500  | -1.57275700 | -0.45294200 |
| Mo | 7.70394400  | 0.02718100  | -2.31318900 |

|    |             |             |             |
|----|-------------|-------------|-------------|
| Se | 9.95543500  | -0.45750500 | 2.73337900  |
| Se | 5.23074900  | -0.23801500 | -6.21619700 |
| Se | 6.62070500  | 1.90604100  | -3.61636800 |
| Se | 6.59373600  | -1.85616400 | -3.62485500 |
| Mo | 7.32405800  | 0.02176000  | -5.02652600 |
| Se | 9.73674000  | 0.56402400  | -0.63311700 |
| Se | 9.51495100  | -0.44496800 | -3.99865700 |
| H  | 10.55892200 | -0.65549100 | -0.70742000 |

## 2. Hydrogen Evolution Reaction (HER) on Pt-MoSe<sub>2</sub>:

### (i) [Pt-MoSe<sub>2</sub>]

|    |             |             |             |
|----|-------------|-------------|-------------|
| Mo | 5.15296200  | 0.54880100  | 0.22943600  |
| Se | 5.46678600  | -1.85904600 | 0.07107100  |
| Pt | 2.92463800  | -1.23338800 | -0.19830500 |
| Se | 2.49170300  | -3.82834600 | -0.12519000 |
| Mo | 0.05101400  | -3.32485800 | -0.02649100 |
| Se | -0.15900900 | -5.96890000 | 0.00006100  |
| Mo | -2.30368400 | -4.77945100 | 0.06972200  |
| Se | 5.17225700  | 2.97272300  | -0.13938400 |
| Se | 3.81919200  | 0.43491400  | -1.93054400 |
| Se | 3.71334300  | 0.71803000  | 2.20570300  |
| Mo | 2.76624200  | 1.81400500  | 0.03497100  |
| Se | 0.92826700  | -1.56331500 | -1.76212100 |
| Se | 1.09832600  | -1.56243600 | 1.63882300  |
| Mo | -0.11262800 | -0.00478100 | -0.00486300 |
| Se | -1.72317600 | -3.40175900 | -1.92460400 |
| Se | -1.58926800 | -3.34466300 | 1.97874200  |

|    |             |             |             |
|----|-------------|-------------|-------------|
| Mo | -2.76719100 | -2.05983500 | 0.04830100  |
| Se | 1.88817700  | 4.24218700  | 0.01723100  |
| Se | 0.74947100  | 1.77041200  | -1.66719900 |
| Se | 0.70187000  | 1.78667200  | 1.65548900  |
| Mo | -0.53316400 | 3.36197400  | -0.02331600 |
| Se | -2.10044400 | -0.16706700 | -1.63808600 |
| Se | -2.05201300 | -0.13510900 | 1.67718700  |
| Mo | -3.09340100 | 1.61619100  | 0.00303000  |
| Se | -4.60906200 | -3.92429400 | 0.10157300  |
| Se | -1.19066000 | 5.89525100  | -0.06739700 |
| Se | -2.21786000 | 3.07322500  | -1.96407700 |
| Se | -2.22317400 | 3.13022700  | 1.92497400  |
| Mo | -3.12098100 | 4.37535900  | -0.04036000 |
| Se | -4.74838000 | -0.41187700 | 0.09052000  |
| Se | -5.23301900 | 3.06120900  | -0.04660400 |

**(ii) [Pt-MoSe<sub>2</sub>]<sup>-</sup>**

|    |             |             |             |
|----|-------------|-------------|-------------|
| Mo | 0.54189600  | 0.28872900  | -0.42645800 |
| Se | 0.04870900  | -0.08111600 | 1.95635300  |
| Pt | 2.62313900  | -0.01298300 | 1.77822900  |
| Se | 4.14589800  | 2.04348000  | 2.76978600  |
| Mo | 5.20573400  | 0.23694800  | 4.24323300  |
| Se | 6.71180600  | 2.14611900  | 5.24554200  |
| Mo | 7.12248500  | -0.08997500 | 6.19723700  |
| Se | -0.34370300 | 2.02970500  | -1.64438200 |
| Se | 2.75021500  | -0.70152000 | -0.71872300 |
| Se | -0.59413900 | -1.80889400 | -1.04653400 |
| Mo | 1.11250500  | -2.39079600 | 0.92518500  |
| Se | 4.99079800  | -0.86541200 | 1.89993500  |
| Se | 2.65660800  | -0.27358100 | 4.28218000  |

|    |             |             |            |
|----|-------------|-------------|------------|
| Mo | 3.48323700  | -2.48208900 | 3.23357500 |
| Se | 7.43075500  | -1.12666800 | 3.95445700 |
| Se | 4.71640100  | -0.45278800 | 6.72821500 |
| Mo | 5.86721300  | -2.48294200 | 5.55075600 |
| Se | -0.15158400 | -4.55731800 | 0.72834000 |
| Se | 3.36087600  | -3.54032400 | 0.83436100 |
| Se | 0.92158200  | -2.91465900 | 3.41046700 |
| Mo | 1.83315700  | -5.03527700 | 2.25311200 |
| Se | 5.68586000  | -3.82603000 | 3.31202800 |
| Se | 3.37092100  | -3.25442800 | 5.69182000 |
| Mo | 4.03478000  | -5.45566800 | 4.47431700 |
| Se | 7.76675500  | -2.18075700 | 7.33115000 |
| Se | 0.90728700  | -7.54713900 | 1.70358200 |
| Se | 4.13380400  | -6.39334000 | 2.02678200 |
| Se | 1.42415700  | -5.73802100 | 4.76809600 |
| Mo | 2.53435200  | -7.55327300 | 3.51907800 |
| Se | 5.90441000  | -5.01990500 | 6.20717600 |
| Se | 4.21382000  | -8.02872100 | 5.20644200 |

**(iii) [Pt-MoSe<sub>2</sub>]H<sub>Se</sub>**

|    |             |             |             |
|----|-------------|-------------|-------------|
| Mo | -0.02055000 | 0.04979700  | 0.45486600  |
| Se | 0.45033600  | 1.34326400  | 2.43614800  |
| Pt | 2.49902000  | -0.06116500 | 1.91939700  |
| Se | 4.79142600  | 2.45957200  | 2.65728800  |
| Mo | 5.66288300  | 0.48307600  | 4.04547300  |
| Se | 7.39001800  | 2.28420700  | 4.91081800  |
| Mo | 7.78956000  | 0.04053900  | 5.78263800  |
| Se | -1.11530400 | 1.28989800  | -1.12379000 |
| Se | 2.07855800  | -0.87177200 | -0.50677600 |
| Se | -1.35000400 | -1.81619900 | 1.14433700  |

|    |            |             |            |
|----|------------|-------------|------------|
| Mo | 1.19530100 | -2.58258500 | 1.31559900 |
| Se | 4.96764800 | -0.73818800 | 1.78866600 |
| Se | 3.10639800 | 0.00456300  | 4.35637700 |
| Mo | 3.73946400 | -2.34935400 | 3.38036400 |
| Se | 7.70922700 | -1.03575000 | 3.52999200 |
| Se | 5.42719800 | -0.10404100 | 6.58240100 |
| Mo | 6.32895700 | -2.25715100 | 5.40293300 |
| Se | 0.32288600 | -4.87676700 | 0.87272000 |
| Se | 3.48262900 | -3.64519900 | 1.12573700 |
| Se | 1.17772100 | -2.72698200 | 3.79759600 |
| Mo | 1.97512900 | -5.00794000 | 2.80006900 |
| Se | 5.89582200 | -3.74556700 | 3.31183700 |
| Se | 3.83648600 | -2.90567800 | 5.88459700 |
| Mo | 4.32914500 | -5.23486800 | 4.79523400 |
| Se | 8.43458100 | -2.00812800 | 6.94003400 |
| Se | 0.74011400 | -7.44933400 | 2.85130200 |
| Se | 4.16429600 | -6.43446300 | 2.46889600 |
| Se | 1.80601500 | -5.42306300 | 5.41911800 |
| Mo | 2.73302100 | -7.39512900 | 4.24466800 |
| Se | 6.38069100 | -4.70997200 | 6.24996600 |
| Se | 4.53486700 | -7.67878200 | 5.84259300 |
| H  | 5.65979300 | 3.60135100  | 3.08579100 |

**(iv) [Pt-MoSe<sub>2</sub>]H<sub>Se</sub>**

|    |             |             |            |
|----|-------------|-------------|------------|
| Mo | 0.00275300  | -0.03795000 | 0.13293700 |
| Se | -0.06455000 | 0.06978000  | 2.51548200 |
| Pt | 2.45428500  | 0.08684500  | 1.80635600 |
| Se | 3.09390300  | 2.04376900  | 3.83392700 |
| Mo | 5.13995100  | 0.20572300  | 4.28159900 |
| Se | 5.87156400  | 1.85064500  | 6.11748300 |



|    |             |             |             |
|----|-------------|-------------|-------------|
| Mo | 7.30730600  | -0.17461100 | 5.91709100  |
| Se | -1.52417900 | 1.25247900  | -1.02220300 |
| Se | 2.24430500  | 0.70935200  | -0.68181500 |
| Se | -0.31544400 | -2.36773400 | -0.57784500 |
| Mo | 2.13474900  | -1.86673000 | -0.32480200 |
| Se | 4.96500500  | 0.47631000  | 1.67908700  |
| Se | 3.01282100  | -1.26367500 | 3.87294800  |
| Mo | 4.51017000  | -2.03951200 | 1.89213700  |
| Se | 7.63841900  | 0.27427600  | 3.47353000  |
| Se | 5.32792900  | -1.69332200 | 6.08511000  |
| Mo | 6.99701100  | -2.20485300 | 4.10718800  |
| Se | 2.45101900  | -3.54540200 | -2.23703200 |
| Se | 4.65606400  | -1.78566400 | -0.71934900 |
| Se | 2.40301700  | -3.50434700 | 1.52073200  |
| Mo | 3.99955800  | -4.29658700 | -0.40282700 |
| Se | 7.05032000  | -2.26057300 | 1.50092700  |
| Se | 5.04120600  | -3.87954600 | 3.63196200  |
| Mo | 6.35081000  | -4.78077000 | 1.57663800  |
| Se | 8.89534400  | -2.05421900 | 5.89810400  |
| Se | 3.82414000  | -6.54284300 | -1.94316700 |
| Se | 6.54889700  | -4.33530200 | -1.00245300 |
| Se | 4.15441100  | -6.19210000 | 1.48894500  |
| Mo | 5.70826700  | -6.58553700 | -0.40280200 |
| Se | 8.12128900  | -4.47024700 | 3.43531400  |
| Se | 7.56470000  | -7.09656600 | 1.08877900  |
| H  | 3.92251800  | 3.07115200  | 3.12445100  |

**(v) TS3**

|    |            |            |            |
|----|------------|------------|------------|
| Mo | 0.11584100 | 0.32864700 | 0.05067700 |
| Se | 0.06310900 | 0.46590100 | 2.48494800 |

|    |             |             |             |
|----|-------------|-------------|-------------|
| Mo | 2.48292100  | 0.18321600  | 1.44621400  |
| Se | 3.29572600  | 0.17079700  | 3.87819200  |
| Mo | 5.77232700  | -0.05532700 | 3.03898000  |
| Se | 6.39584800  | -0.04839100 | 5.56566800  |
| Mo | 8.33818800  | -0.24634300 | 4.07856600  |
| Se | -0.22180000 | 0.40542900  | -2.35900300 |
| Se | 1.80017400  | 2.14397400  | -0.13666400 |
| Se | 1.44243500  | -1.76341100 | 0.04111100  |
| Mo | 2.38084200  | 0.00065800  | -1.64820100 |
| Se | 4.60847500  | 1.67681200  | 1.45470900  |
| Se | 4.33714500  | -1.66739700 | 1.58995200  |
| Mo | 5.31274300  | -0.13945400 | -0.24219900 |
| Se | 7.60338200  | 1.74604900  | 2.75084700  |
| Se | 7.29626800  | -2.16212700 | 2.83116200  |
| Mo | 8.33735700  | -0.32502900 | 1.31676900  |
| Se | 2.37666700  | -0.69668600 | -4.06931500 |
| Se | 4.42858900  | 1.61922500  | -1.93064400 |
| Se | 4.10120300  | -1.97265000 | -1.68329800 |
| Mo | 4.82018700  | -0.29087000 | -3.46930500 |
| Se | 7.39976100  | 1.41046000  | -0.40286100 |
| Se | 7.15166700  | -1.92918200 | -0.38737200 |
| Pt | 7.47261600  | -0.24163300 | -2.28929400 |
| Se | 10.45585100 | -0.23932900 | 2.76975600  |
| Se | 7.87853200  | -0.43482700 | -7.26397900 |
| Se | 4.87281500  | 1.20032700  | -5.50688200 |
| Se | 6.70062000  | -2.01704500 | -3.98433000 |
| Mo | 7.06051700  | 0.14596900  | -5.18403800 |
| Se | 10.18841100 | -0.56165200 | -0.69553400 |
| Se | 8.42315600  | 1.59294900  | -3.84723100 |
| H  | 9.87147600  | -1.93752900 | -1.18652900 |

**(vi) [Pt-MoSe<sub>2</sub>]H<sub>Pt</sub>**

|    |             |             |             |
|----|-------------|-------------|-------------|
| Mo | 0.05075800  | -0.04228100 | -0.17750500 |
| Se | -0.06778700 | -0.18065100 | 2.22384700  |
| Pt | 2.50045500  | -0.03914000 | 1.68566900  |
| Se | 3.26284900  | -0.47850700 | 4.08955600  |
| Mo | 5.16671500  | -1.85491600 | 3.23315400  |
| Se | 5.69507400  | -1.92898900 | 5.86761500  |
| Mo | 7.31437900  | -3.11843800 | 4.48130200  |
| Se | -1.74450200 | 1.10905700  | -1.04325800 |
| Se | 2.13008600  | 1.21515300  | -0.64266100 |
| Se | 0.16465900  | -2.27319300 | -1.08404700 |
| Mo | 2.48011600  | -1.18370300 | -1.50375200 |
| Se | 5.03121900  | -0.02538200 | 1.36531200  |
| Se | 3.13838500  | -2.66435300 | 1.71437000  |
| Mo | 4.94537500  | -2.22094400 | -0.10866100 |
| Se | 7.65901700  | -1.18671900 | 2.93900500  |
| Se | 5.52030900  | -4.41310100 | 3.32398200  |
| Mo | 7.41135400  | -3.50392400 | 1.75810600  |
| Se | 2.51050100  | -1.27175800 | -3.96380900 |
| Se | 4.87694300  | -0.36130800 | -1.88560200 |
| Se | 3.14275200  | -3.60637700 | -1.34207100 |
| Mo | 4.60213700  | -2.59217600 | -3.20597000 |
| Se | 7.48414800  | -1.82213100 | -0.24847500 |
| Se | 5.75654800  | -4.65731700 | 0.14237500  |
| Mo | 7.17007300  | -3.86057900 | -1.88430100 |
| Se | 9.14875000  | -4.41960500 | 3.49064900  |
| Se | 4.69272900  | -3.22554900 | -5.80216900 |
| Se | 7.07438500  | -1.81436000 | -3.50124200 |
| Se | 5.24347700  | -5.18514400 | -3.03108700 |
| Mo | 6.70906900  | -3.97517700 | -4.62211000 |

|    |            |             |             |
|----|------------|-------------|-------------|
| Se | 8.89865000 | -4.60909700 | -0.06816700 |
| Se | 8.67905300 | -5.09167700 | -3.65880700 |
| H  | 2.36472700 | 1.49777000  | 2.08862800  |

**(vii) [Pt-MoSe<sub>2</sub>]H<sub>Pt</sub>H<sub>Se</sub>**

|    |             |             |             |
|----|-------------|-------------|-------------|
| Mo | 0.00521200  | 0.02868800  | -0.01689600 |
| Se | 0.00896800  | 0.20600900  | 2.36352000  |
| Pt | 2.57522700  | 0.03641000  | 1.68379600  |
| Se | 3.23341900  | -0.29182000 | 4.14448200  |
| Mo | 5.26351600  | -1.88448700 | 3.26581200  |
| Se | 5.87707100  | -1.71089900 | 5.76168900  |
| Mo | 7.41205300  | -3.18464500 | 4.46745400  |
| Se | -1.79728400 | 1.07886800  | -0.95055200 |
| Se | 2.12234000  | 1.11949200  | -0.69325400 |
| Se | 0.06140800  | -2.32391900 | -0.54959000 |
| Mo | 2.30479500  | -1.36972500 | -1.38332600 |
| Se | 5.09472700  | -0.13127600 | 1.32129400  |
| Se | 3.06960600  | -2.64672100 | 1.92976900  |
| Mo | 4.79551400  | -2.42072500 | -0.00679600 |
| Se | 7.74820900  | -1.34245500 | 2.79526600  |
| Se | 5.47393000  | -4.43120700 | 3.47559400  |
| Mo | 7.30991400  | -3.69085900 | 1.77418800  |
| Se | 2.12225900  | -1.65510400 | -3.80296800 |
| Se | 4.72281000  | -0.65888900 | -1.85633800 |
| Se | 2.88594500  | -3.80124200 | -1.08521900 |
| Mo | 4.27323800  | -2.89759800 | -3.07315500 |
| Se | 7.33438200  | -2.12319400 | -0.32461300 |
| Se | 5.53705400  | -4.87202400 | 0.31222800  |
| Mo | 6.85423100  | -4.20209600 | -1.83605900 |
| Se | 9.09228900  | -4.63096500 | 3.36349600  |
| Se | 4.28068400  | -3.56281300 | -5.67484700 |
| Se | 6.78593600  | -2.23540300 | -3.56966500 |
| Se | 4.80497300  | -5.50137600 | -2.83262900 |
| Mo | 6.25466100  | -4.44348100 | -4.51808900 |
| Se | 8.62709200  | -4.96526600 | -0.15004600 |
| Se | 8.27211300  | -5.51888800 | -3.65966500 |
| H  | 2.55988900  | 1.61272000  | 1.92930300  |
| H  | 4.03607600  | 0.95977400  | 4.30559800  |

**(viii) TS4**

|    |             |            |             |
|----|-------------|------------|-------------|
| Mo | -0.30072000 | 0.18160100 | -0.00249800 |
| Se | -0.36377900 | 0.06322300 | 2.44444300  |

|    |             |             |             |
|----|-------------|-------------|-------------|
| Mo | 2.05551500  | 0.11928900  | 1.39269300  |
| Se | 2.89694400  | 0.10884400  | 3.83039400  |
| Mo | 5.37247400  | 0.08627200  | 2.95261700  |
| Se | 6.03022300  | 0.04112800  | 5.44282100  |
| Mo | 7.94769400  | 0.08307300  | 3.89469600  |
| Se | -0.56622300 | 0.34956600  | -2.42497300 |
| Se | 1.18666100  | 2.13853200  | -0.04137000 |
| Se | 1.19645100  | -1.75781200 | -0.22293000 |
| Mo | 2.04019400  | 0.23234200  | -1.72584900 |
| Se | 4.09067600  | 1.75373200  | 1.45566400  |
| Se | 4.04540100  | -1.57793600 | 1.41590500  |
| Mo | 4.84464000  | 0.08228700  | -0.37302100 |
| Se | 7.11431400  | 1.98439100  | 2.49065600  |
| Se | 7.00458300  | -1.88193900 | 2.65332500  |
| Mo | 7.91510100  | -0.02012600 | 1.12027500  |
| Se | 2.27849000  | 0.21710300  | -4.24330000 |
| Se | 3.84385800  | 2.10085000  | -1.69093700 |
| Se | 3.80056000  | -1.66818000 | -1.94897300 |
| Mo | 4.56380600  | 0.35110900  | -3.30714500 |
| Se | 6.96269700  | 1.50695300  | -0.90103900 |
| Se | 6.88605800  | -1.67216800 | -0.64367600 |
| Pt | 8.03358400  | -0.25874100 | -2.46044600 |
| Se | 10.01456600 | -0.36431900 | 2.58665500  |
| Se | 7.21442800  | 0.63745200  | -7.38438000 |
| Se | 5.36203500  | 2.48648700  | -4.55297800 |
| Se | 6.27992000  | -1.33897000 | -4.18427700 |
| Mo | 7.00810600  | 0.82276900  | -5.12159500 |
| Se | 9.89405200  | 0.15848000  | -0.70270700 |
| Se | 9.10486200  | 1.46322300  | -4.14440000 |
| H  | 9.02277100  | -1.44469900 | -3.29085800 |
| H  | 9.14569900  | -2.37126100 | -3.15165600 |
| O  | 9.34558900  | -3.63767800 | -2.94412800 |
| H  | 9.81277500  | -3.66083800 | -2.04533800 |
| H  | 9.96770300  | -3.96763800 | -3.61450200 |
| O  | 10.34039100 | -3.36968000 | -0.53409600 |
| H  | 9.72409400  | -3.77171300 | 0.14319000  |
| H  | 11.23322900 | -3.62987400 | -0.26616500 |
| O  | 8.66021600  | -4.47198000 | 1.24960500  |
| H  | 8.88398800  | -5.34078300 | 1.61027200  |
| H  | 7.69723300  | -4.52042400 | 1.05370400  |
| O  | 5.91419900  | -4.73076800 | 0.80867300  |
| H  | 5.27981000  | -4.58041300 | 1.52455100  |
| H  | 5.48340600  | -4.38004100 | 0.01535900  |
| H  | 10.31134400 | -1.27588100 | -0.52675600 |

**(ix) [Pt-MoSe<sub>2</sub>]H<sub>Se</sub><sup>+</sup>**

|    |             |             |             |
|----|-------------|-------------|-------------|
| Mo | -0.00284400 | 0.02452100  | -0.28957400 |
| Se | 0.12940000  | -1.44474700 | 1.61757300  |
| Pt | 2.49320500  | -0.72416500 | 1.03530700  |

|    |             |             |             |
|----|-------------|-------------|-------------|
| Se | 3.50848900  | -0.43426000 | 4.40770800  |
| Mo | 5.43827100  | -1.72348900 | 3.33311500  |
| Se | 6.40982000  | -1.67279700 | 5.79007100  |
| Mo | 7.85243100  | -2.83388100 | 4.21385000  |
| Se | -1.72784500 | 1.51717100  | -0.33634000 |
| Se | 2.10365000  | 1.33475000  | -0.47841500 |
| Se | -0.15260600 | -1.43844200 | -2.25360000 |
| Mo | 2.24180300  | -0.84666600 | -1.84308900 |
| Se | 4.92205300  | 0.00853300  | 1.40173800  |
| Se | 3.43615400  | -2.83191000 | 2.03777800  |
| Mo | 4.84190800  | -2.09184300 | -0.05233000 |
| Se | 7.79599100  | -0.93136100 | 2.60121000  |
| Se | 5.96527800  | -4.26165200 | 3.42655300  |
| Mo | 7.48403500  | -3.29714700 | 1.53398000  |
| Se | 2.63484100  | -0.98932300 | -4.32429200 |
| Se | 4.74931200  | -0.27741100 | -1.95397500 |
| Se | 2.82490600  | -3.20311200 | -1.27311600 |
| Mo | 4.34765700  | -2.51555600 | -3.28238100 |
| Se | 7.32592800  | -1.71379200 | -0.53671300 |
| Se | 5.62160300  | -4.52302400 | 0.14929600  |
| Mo | 6.85910400  | -3.82239000 | -2.05108800 |
| Se | 9.51470500  | -4.10999700 | 2.92885300  |
| Se | 4.23202900  | -3.37680900 | -5.84961800 |
| Se | 6.79873700  | -1.87161900 | -3.78330100 |
| Se | 4.79237800  | -5.09617100 | -2.96009700 |
| Mo | 6.25170400  | -4.10625100 | -4.71068500 |
| Se | 8.73649800  | -4.48447500 | -0.40364900 |
| Se | 8.19372900  | -5.27292500 | -3.75181600 |
| H  | 3.93747600  | -0.31176600 | 5.83264700  |

### 3. Pt-MoSe<sub>2</sub> for Oxygen Reduction Reaction (ORR).

#### (i) [Pt-MoSe<sub>2</sub>]

|    |            |             |             |
|----|------------|-------------|-------------|
| Mo | 5.15296200 | 0.54880100  | 0.22943600  |
| Se | 5.46678600 | -1.85904600 | 0.07107100  |
| Pt | 2.92463800 | -1.23338800 | -0.19830500 |
| Se | 2.49170300 | -3.82834600 | -0.12519000 |
| Mo | 0.05101400 | -3.32485800 | -0.02649100 |

|    |             |             |             |
|----|-------------|-------------|-------------|
| Se | -0.15900900 | -5.96890000 | 0.00006100  |
| Mo | -2.30368400 | -4.77945100 | 0.06972200  |
| Se | 5.17225700  | 2.97272300  | -0.13938400 |
| Se | 3.81919200  | 0.43491400  | -1.93054400 |
| Se | 3.71334300  | 0.71803000  | 2.20570300  |
| Mo | 2.76624200  | 1.81400500  | 0.03497100  |
| Se | 0.92826700  | -1.56331500 | -1.76212100 |
| Se | 1.09832600  | -1.56243600 | 1.63882300  |
| Mo | -0.11262800 | -0.00478100 | -0.00486300 |
| Se | -1.72317600 | -3.40175900 | -1.92460400 |
| Se | -1.58926800 | -3.34466300 | 1.97874200  |
| Mo | -2.76719100 | -2.05983500 | 0.04830100  |
| Se | 1.88817700  | 4.24218700  | 0.01723100  |
| Se | 0.74947100  | 1.77041200  | -1.66719900 |
| Se | 0.70187000  | 1.78667200  | 1.65548900  |
| Mo | -0.53316400 | 3.36197400  | -0.02331600 |
| Se | -2.10044400 | -0.16706700 | -1.63808600 |
| Se | -2.05201300 | -0.13510900 | 1.67718700  |
| Mo | -3.09340100 | 1.61619100  | 0.00303000  |
| Se | -4.60906200 | -3.92429400 | 0.10157300  |
| Se | -1.19066000 | 5.89525100  | -0.06739700 |
| Se | -2.21786000 | 3.07322500  | -1.96407700 |
| Se | -2.22317400 | 3.13022700  | 1.92497400  |
| Mo | -3.12098100 | 4.37535900  | -0.04036000 |
| Se | -4.74838000 | -0.41187700 | 0.09052000  |
| Se | -5.23301900 | 3.06120900  | -0.04660400 |

**(ii) [O<sub>2</sub>\_Pt-MoSe<sub>2</sub>]**

|    |             |             |            |
|----|-------------|-------------|------------|
| Mo | -0.06690200 | -0.49054100 | 0.04412200 |
| Se | -0.07225600 | -0.51646500 | 2.46558100 |
| Pt | 2.34232900  | -0.15342900 | 1.55844200 |
| Se | 3.08344000  | -0.48523400 | 4.07224200 |

|    |             |             |             |
|----|-------------|-------------|-------------|
| Mo | 5.40770800  | -0.83469400 | 3.24679300  |
| Se | 5.91288700  | -1.21567200 | 5.82597300  |
| Mo | 7.88824200  | -1.32638700 | 4.38055700  |
| Se | -0.25887800 | 0.34783700  | -2.37657300 |
| Se | 1.27831100  | 1.69710100  | 0.19300200  |
| Se | 1.05159300  | -2.48866100 | -0.63565600 |
| Mo | 2.08283000  | -0.13484300 | -1.51057900 |
| Se | 4.50343900  | 1.16434600  | 1.79938200  |
| Se | 3.95911000  | -2.18946000 | 1.48490500  |
| Mo | 5.17306100  | -0.51008600 | -0.03499500 |
| Se | 7.36994400  | 0.86254400  | 3.30553700  |
| Se | 6.80931400  | -2.97250900 | 2.85045900  |
| Mo | 8.04056100  | -1.02859200 | 1.64523100  |
| Se | 2.70142700  | 0.03179000  | -4.02917300 |
| Se | 4.23043000  | 1.38989200  | -1.50672200 |
| Se | 4.01644000  | -1.87770400 | -1.86954400 |
| Mo | 5.19791900  | -0.13691800 | -3.41792300 |
| Se | 7.31769300  | 0.91804100  | 0.04715000  |
| Se | 6.94735800  | -2.34485800 | -0.33480400 |
| Mo | 7.93998600  | -0.56529700 | -2.00652900 |
| Se | 10.06281600 | -1.49526900 | 3.22523400  |
| Se | 5.57669000  | 0.19249200  | -5.99473200 |
| Se | 7.07262400  | 1.61666000  | -3.11093700 |
| Se | 6.72986600  | -2.21360000 | -3.60193500 |
| Mo | 7.64797300  | -0.19014400 | -4.72809600 |
| Se | 9.80714100  | -1.02166800 | -0.25206700 |
| Se | 9.89019500  | -0.49185800 | -3.72261300 |
| O  | 6.33161400  | 4.20078300  | 1.09671100  |
| O  | 5.85402500  | 4.13492000  | -0.02150300 |

**(iii) [2O\_Pt-MoSe<sub>2</sub>]**

|    |             |             |             |
|----|-------------|-------------|-------------|
| Mo | 0.01446400  | 0.10414000  | -0.15080900 |
| Se | -0.11194600 | 0.20034500  | 2.20705700  |
| Pt | 2.37412600  | 0.09066900  | 1.50676200  |
| Se | 3.13080500  | 0.59686900  | 3.93141600  |
| Mo | 5.26998000  | 1.80142900  | 3.31047400  |
| Se | 5.75027200  | 1.76633900  | 5.90897700  |
| Mo | 7.57761800  | 2.71443400  | 4.57835800  |
| Se | -1.87205400 | -0.54864500 | -1.26856900 |
| Se | 0.35985800  | 2.54508200  | -0.64578800 |
| Se | 2.00620800  | -1.21762400 | -0.77590300 |
| Mo | 2.64721600  | 1.22872700  | -1.33129000 |
| Se | 3.46758900  | 3.06764800  | 1.80804200  |
| Se | 4.87914100  | 0.03623500  | 1.40646000  |
| Mo | 5.10114000  | 2.17503500  | -0.07108800 |
| Se | 5.97851500  | 4.28008800  | 3.47658900  |
| Se | 7.62941600  | 0.79866500  | 2.99585500  |
| Mo | 7.67085400  | 3.14071600  | 1.85475800  |
| Se | 2.46902800  | 1.53460000  | -3.82044500 |



|    |            |            |             |
|----|------------|------------|-------------|
| Se | 3.38067600 | 3.66340600 | -1.28640600 |
| Se | 4.91321500 | 0.22468000 | -1.77529200 |
| Mo | 4.72694600 | 2.43584500 | -3.11782200 |
| Se | 6.15038700 | 4.50015800 | 0.23324400  |
| Se | 7.57763500 | 1.48509200 | -0.17065600 |
| Mo | 7.45373600 | 3.52139700 | -1.80243700 |
| Se | 9.49268500 | 3.89867000 | 3.50672400  |
| Se | 5.00829300 | 2.92625200 | -5.76956300 |
| Se | 5.60421500 | 4.95747400 | -2.97453700 |
| Se | 7.19361500 | 1.49020700 | -3.42441600 |
| Mo | 6.98477600 | 3.66514700 | -4.53481800 |
| Se | 9.23793400 | 4.13114700 | -0.06428300 |
| Se | 9.09020000 | 4.53132200 | -3.66409900 |
| O  | 3.68861300 | 4.77783600 | 1.86309500  |
| O  | 0.95134000 | 3.28798000 | 0.82428900  |

**(iv) [2O\_Pt-MoSe<sub>2</sub>]**

|    |             |             |             |
|----|-------------|-------------|-------------|
| Mo | 0.02484600  | 0.09766200  | -0.16225200 |
| Se | -0.11421000 | 0.20047100  | 2.19761900  |
| Pt | 2.38174100  | 0.10433700  | 1.51502100  |
| Se | 3.13745000  | 0.60469300  | 3.94224400  |
| Mo | 5.28886700  | 1.81657900  | 3.32039100  |
| Se | 5.76382100  | 1.76764700  | 5.92124000  |
| Mo | 7.59286900  | 2.70985300  | 4.56867300  |
| Se | -1.84119600 | -0.58904900 | -1.31992100 |
| Se | 0.35193200  | 2.54234000  | -0.66473400 |
| Se | 2.02846600  | -1.22124000 | -0.76223800 |
| Mo | 2.64497000  | 1.22377800  | -1.33364200 |
| Se | 3.47964100  | 3.08083900  | 1.83403400  |
| Se | 4.88813800  | 0.04842900  | 1.42158900  |
| Mo | 5.09351400  | 2.18052900  | -0.06691100 |
| Se | 6.02512900  | 4.31071900  | 3.48130000  |
| Se | 7.66072500  | 0.78458300  | 2.99525100  |
| Mo | 7.66587200  | 3.12991900  | 1.83019200  |
| Se | 2.46344300  | 1.53251800  | -3.82436500 |
| Se | 3.37538100  | 3.66328900  | -1.28256100 |
| Se | 4.92051700  | 0.23635800  | -1.77173900 |
| Mo | 4.72476100  | 2.44087000  | -3.11665000 |
| Se | 6.13998200  | 4.52094600  | 0.24370100  |
| Se | 7.57223800  | 1.46550400  | -0.17589300 |
| Mo | 7.41672800  | 3.50667900  | -1.79550700 |
| Se | 9.54229800  | 3.79891900  | 3.53801100  |
| Se | 4.99314300  | 2.92729200  | -5.77797100 |
| Se | 5.59682000  | 4.99198600  | -2.97155000 |
| Se | 7.21230300  | 1.47857800  | -3.44912100 |
| Mo | 6.96196100  | 3.67107500  | -4.52665400 |
| Se | 9.21082400  | 4.14212900  | -0.03384900 |
| Se | 9.07251200  | 4.51748500  | -3.67014700 |
| O  | 3.67678100  | 4.80091200  | 1.85156700  |

|   |            |            |            |
|---|------------|------------|------------|
| O | 0.84422700 | 3.32473300 | 0.80874800 |
|---|------------|------------|------------|

**(v) [OH\_O\_Pt-MoSe<sub>2</sub>]**

|    |             |             |             |
|----|-------------|-------------|-------------|
| Mo | -0.00303700 | 0.00654400  | -0.00240300 |
| Se | -0.00649700 | -0.00527200 | 2.42633000  |
| Pt | 2.38931500  | -0.00781200 | 1.45800600  |
| Se | 3.43444600  | 0.79156800  | 3.64355000  |
| Mo | 5.74588400  | 1.34272300  | 2.71238100  |
| Se | 6.40859900  | 1.64812700  | 5.23912000  |
| Mo | 8.28812200  | 1.89527900  | 3.67116600  |
| Se | -0.38176900 | 0.10293700  | -2.42251300 |
| Se | 1.02166100  | 2.33418400  | -0.22013100 |
| Se | 1.70193400  | -1.80500200 | -0.32280700 |
| Mo | 2.13114100  | 0.41371600  | -1.64480300 |
| Se | 4.13807200  | 2.72396600  | 1.11936400  |
| Se | 4.82288700  | -0.61477900 | 1.21381100  |
| Mo | 5.26211900  | 1.12606000  | -0.63456100 |
| Se | 6.99733700  | 3.58743900  | 2.37677100  |
| Se | 7.78957100  | -0.22916600 | 2.47798400  |
| Mo | 8.18720900  | 1.81498200  | 0.91186000  |
| Se | 2.51195700  | 0.36928000  | -4.24781000 |
| Se | 3.73689300  | 2.45204200  | -2.19024500 |
| Se | 4.43513300  | -0.83427000 | -2.05038200 |
| Mo | 4.98084800  | 0.92730400  | -3.91840300 |
| Se | 6.84528100  | 3.19086600  | -0.87286000 |
| Se | 7.50976400  | -0.10265000 | -0.75944200 |
| Mo | 7.77856900  | 1.55803200  | -2.75479000 |
| Se | 10.31505300 | 2.33407100  | 2.32363600  |
| Se | 5.11618800  | 0.83248700  | -6.54346000 |
| Se | 6.25158000  | 3.17721900  | -4.09202800 |
| Se | 7.04513900  | -0.63113800 | -3.95444000 |
| Mo | 7.25310400  | 1.34888800  | -5.45609500 |
| Se | 9.73939300  | 2.14779700  | -1.14760100 |
| Se | 9.55444200  | 1.76740900  | -4.62649700 |
| O  | -0.00037500 | 3.33223000  | -1.45394000 |
| O  | 4.92369900  | 4.21284600  | 0.54792500  |
| H  | 0.00311000  | 2.84891900  | -2.30229000 |

**(vi) TS5**

|    |             |             |             |
|----|-------------|-------------|-------------|
| Mo | 0.03423400  | 0.21334300  | 0.14102700  |
| Se | 0.09704400  | -0.11306800 | 2.55039400  |
| Pt | 2.44665900  | -0.04368900 | 1.48467900  |
| Se | 3.49535800  | 0.70424200  | 3.68457300  |
| Mo | 5.77210500  | 1.30888500  | 2.72863900  |
| Se | 6.45290700  | 1.60126400  | 5.25975200  |
| Mo | 8.31677800  | 1.87175600  | 3.68343300  |
| Se | -0.44535600 | 0.46486400  | -2.31817300 |

|    |             |             |             |
|----|-------------|-------------|-------------|
| Se | 0.98740000  | 2.43601800  | -0.27963800 |
| Se | 1.58784800  | -1.71279000 | -0.36547700 |
| Mo | 2.12678300  | 0.51882700  | -1.58673300 |
| Se | 4.13404900  | 2.70453500  | 1.16964300  |
| Se | 4.86659800  | -0.66521700 | 1.22354700  |
| Mo | 5.25969800  | 1.11912200  | -0.59995300 |
| Se | 7.00900700  | 3.56466200  | 2.40811900  |
| Se | 7.82549800  | -0.25045600 | 2.48385200  |
| Mo | 8.20448900  | 1.80594500  | 0.92766600  |
| Se | 2.47333600  | 0.44078700  | -4.19674900 |
| Se | 3.77786900  | 2.50371200  | -2.14389300 |
| Se | 4.39835200  | -0.80221800 | -2.03411900 |
| Mo | 4.95992100  | 0.96408500  | -3.89289700 |
| Se | 6.84828400  | 3.18516000  | -0.83898000 |
| Se | 7.51078800  | -0.10120100 | -0.74741100 |
| Mo | 7.77250400  | 1.56245100  | -2.73863000 |
| Se | 10.33624000 | 2.32886600  | 2.32326700  |
| Se | 5.07728000  | 0.87434000  | -6.51635300 |
| Se | 6.26370900  | 3.20009300  | -4.07098200 |
| Se | 7.00708700  | -0.61637400 | -3.93564400 |
| Mo | 7.23040200  | 1.35835500  | -5.44023300 |
| Se | 9.74120800  | 2.15144400  | -1.15118600 |
| Se | 9.53873300  | 1.75513300  | -4.62806400 |
| O  | -0.36137600 | 2.64645500  | -2.07631000 |
| O  | 4.91765000  | 4.19863000  | 0.59719800  |
| H  | 0.06498600  | 3.07698500  | -2.84881600 |

**(vii) [O\_Pt-MoSe<sub>2</sub>]**

|    |             |             |             |
|----|-------------|-------------|-------------|
| Mo | -0.08066200 | 0.24941300  | -0.06822800 |
| Se | -0.41393900 | -0.29256200 | 2.27595200  |
| Pt | 2.10545700  | -0.54441600 | 1.46467600  |
| Se | 3.10648400  | -0.40970300 | 3.85424500  |
| Mo | 5.52662600  | -0.69202400 | 3.18114700  |
| Se | 5.99468500  | -0.93514900 | 5.77384500  |
| Mo | 7.97366800  | -1.27448700 | 4.36314300  |
| Se | -0.23137800 | 0.74815700  | -2.42864700 |
| Se | 1.75276900  | 1.87472300  | 0.36965300  |
| Se | 1.04268300  | -1.96225900 | -0.46854200 |
| Mo | 2.22085700  | 0.13493800  | -1.50390900 |
| Se | 4.78169200  | 1.38053400  | 1.70776100  |
| Se | 4.12251700  | -2.05505300 | 1.42581700  |
| Mo | 5.28460700  | -0.40061500 | -0.15614300 |
| Se | 7.57138500  | 0.91878400  | 3.26206700  |
| Se | 6.85326500  | -2.90303000 | 2.86400500  |
| Mo | 8.12701200  | -1.00472900 | 1.61600600  |
| Se | 2.81913300  | 0.29721100  | -4.00978200 |
| Se | 4.46939300  | 1.54318400  | -1.60323100 |
| Se | 4.00646200  | -1.77496600 | -1.90071100 |

|    |             |             |             |
|----|-------------|-------------|-------------|
| Mo | 5.30241500  | -0.11920700 | -3.46258100 |
| Se | 7.53310300  | 0.95307800  | -0.02647300 |
| Se | 6.97019900  | -2.33379000 | -0.34241300 |
| Mo | 8.00422700  | -0.68124900 | -2.08285900 |
| Se | 10.14694400 | -1.48599000 | 3.19336000  |
| Se | 5.64380200  | 0.05526100  | -6.05179800 |
| Se | 7.27989900  | 1.53030200  | -3.23603900 |
| Se | 6.68183800  | -2.30438800 | -3.62237000 |
| Mo | 7.71735900  | -0.36153600 | -4.80305600 |
| Se | 9.87789600  | -1.03513700 | -0.30240500 |
| Se | 9.92429900  | -0.89768500 | -3.79583900 |
| O  | 6.16235500  | 2.45986100  | 1.38418600  |

**(vii) [O\_Pt-MoSe<sub>2</sub>]-**

|    |             |             |             |
|----|-------------|-------------|-------------|
| Mo | 0.01061000  | 0.00915800  | -0.00979300 |
| Se | -0.04956000 | 0.00609000  | 2.41477200  |
| Pt | 2.43070800  | -0.01818900 | 1.37638000  |
| Se | 3.60357600  | 0.88649600  | 3.50150100  |
| Mo | 5.96706900  | 0.88173600  | 2.59046000  |
| Se | 6.69391800  | 1.36875100  | 5.09631600  |
| Mo | 8.56116300  | 1.03295000  | 3.52696400  |
| Se | -0.48731600 | -0.11072800 | -2.36862700 |
| Se | 1.51848800  | 1.97521000  | -0.19479800 |
| Se | 1.49951800  | -2.01560800 | -0.05511000 |
| Mo | 2.15006000  | -0.06392000 | -1.68058900 |
| Se | 4.70834600  | 2.34599000  | 0.77257000  |
| Se | 4.71525200  | -1.09256400 | 1.38527200  |
| Mo | 5.39470400  | 0.27961600  | -0.68108500 |
| Se | 7.65851300  | 2.81374400  | 2.04903000  |
| Se | 7.68034000  | -1.09605600 | 2.59753500  |
| Mo | 8.38169200  | 0.65448500  | 0.78873900  |
| Se | 2.44887800  | -0.41309800 | -4.22133700 |
| Se | 4.06335000  | 1.64088600  | -2.39315000 |
| Se | 4.24021900  | -1.67481500 | -1.87316400 |
| Mo | 5.00416100  | -0.25853700 | -3.93693100 |
| Se | 7.28565700  | 2.06661600  | -1.12902000 |
| Se | 7.39859300  | -1.33084500 | -0.64288300 |
| Mo | 7.84400600  | 0.02811600  | -2.83270500 |
| Se | 10.61015800 | 0.90949700  | 2.16727400  |
| Se | 5.05615000  | -0.67110000 | -6.53546800 |
| Se | 6.62705300  | 1.74116500  | -4.37193000 |
| Se | 6.80009500  | -2.15815800 | -3.78736300 |
| Mo | 7.26763700  | -0.39361000 | -5.49502200 |
| Se | 9.89978800  | 0.49844300  | -1.32293600 |
| Se | 9.60822400  | -0.21623400 | -4.76070500 |
| O  | 5.82015200  | 3.51609700  | -0.02296800 |

**(viii) [OH\_Pt-MoSe<sub>2</sub>]**

|    |             |             |             |
|----|-------------|-------------|-------------|
| Mo | 0.08396700  | -0.02097800 | -0.14102300 |
| Se | 0.02560100  | -0.00835400 | 2.27522300  |
| Pt | 2.57182200  | -0.00429400 | 1.26704500  |
| Se | 3.55823000  | 0.76471100  | 3.58677500  |
| Mo | 5.95573900  | 0.72633900  | 2.72910800  |
| Se | 6.66793500  | 1.15397000  | 5.21257800  |
| Mo | 8.56326100  | 0.84023200  | 3.65509500  |
| Se | -0.43127000 | -0.10474800 | -2.47893100 |
| Se | 1.58645800  | 1.91931600  | -0.35403500 |
| Se | 1.60070200  | -1.96659300 | -0.20699100 |
| Mo | 2.40093500  | -0.06393300 | -1.90006800 |
| Se | 4.63210000  | 2.27013600  | 1.02533900  |
| Se | 4.71537100  | -1.25287700 | 1.54695900  |
| Mo | 5.30750200  | 0.21894200  | -0.47720300 |
| Se | 7.69137900  | 2.61390300  | 2.15589000  |
| Se | 7.65514800  | -1.27716000 | 2.72598900  |
| Mo | 8.38574900  | 0.44371100  | 0.91431200  |
| Se | 2.38577300  | -0.40180300 | -4.35828500 |
| Se | 4.15767400  | 1.76038600  | -2.24668600 |
| Se | 4.28295300  | -1.79210400 | -1.75408100 |
| Mo | 4.86022300  | -0.23541000 | -3.69110900 |
| Se | 7.27273400  | 1.82441400  | -1.00539800 |
| Se | 7.30771400  | -1.46002600 | -0.52162400 |
| Mo | 7.80761800  | -0.08026800 | -2.68185300 |
| Se | 10.60430600 | 0.65698900  | 2.29032600  |
| Se | 5.02763500  | -0.57647200 | -6.37528600 |
| Se | 6.62384600  | 1.68797700  | -4.22326300 |
| Se | 6.66913800  | -2.21025800 | -3.71511500 |
| Mo | 7.23439400  | -0.43408700 | -5.34044000 |
| Se | 9.90340200  | 0.16686400  | -1.17210600 |
| Se | 9.56338700  | -0.32475400 | -4.66105700 |
| O  | 5.69773800  | 3.73848300  | 0.37111200  |
| H  | 5.29859000  | 4.53083300  | 0.77368300  |

**(ix) TS6**

|    |             |             |             |
|----|-------------|-------------|-------------|
| Mo | -0.01621600 | -0.01680600 | -0.02151900 |
| Se | -0.02200800 | 0.00465400  | 2.40249400  |
| Pt | 2.36740800  | 0.01376600  | 1.44863200  |
| Se | 3.31209800  | 0.99653200  | 3.61119400  |
| Mo | 5.53620000  | 1.67451900  | 2.60007600  |
| Se | 6.10167200  | 2.33758900  | 5.09498300  |
| Mo | 8.00789600  | 2.51437800  | 3.55805300  |
| Se | -0.35019500 | -0.42027200 | -2.48823700 |
| Se | 0.76663100  | 2.18350100  | -0.87746600 |
| Se | 1.67593500  | -1.89951100 | -0.19385900 |
| Mo | 2.10328700  | 0.14241700  | -1.74852500 |
| Se | 3.76421900  | 2.67130000  | 0.84095500  |

|    |             |             |             |
|----|-------------|-------------|-------------|
| Se | 4.81881500  | -0.53652300 | 1.34403700  |
| Mo | 5.19467300  | 1.03783200  | -0.64818500 |
| Se | 6.67555100  | 3.93264700  | 2.01403400  |
| Se | 7.67764100  | 0.22009500  | 2.64978500  |
| Mo | 8.03914200  | 2.05475900  | 0.83466400  |
| Se | 2.57222300  | -0.17931800 | -4.30401300 |
| Se | 3.70763100  | 2.12753700  | -2.41981100 |
| Se | 4.46585600  | -1.07189700 | -1.89833700 |
| Mo | 5.02056400  | 0.46770100  | -3.94444100 |
| Se | 6.65567900  | 3.08103200  | -1.13383800 |
| Se | 7.51074900  | -0.08119300 | -0.60180600 |
| Mo | 7.76563400  | 1.36470700  | -2.77693300 |
| Se | 10.07009100 | 2.88098200  | 2.25967000  |
| Se | 5.25455900  | 0.09404400  | -6.53774500 |
| Se | 6.21712800  | 2.72952800  | -4.36104400 |
| Se | 7.15370800  | -0.98026700 | -3.71125500 |
| Mo | 7.33975400  | 0.79229000  | -5.44857200 |
| Se | 9.67713400  | 2.12985800  | -1.16734600 |
| Se | 9.56634200  | 1.52363100  | -4.63207400 |
| O  | 4.00183300  | 4.42125900  | 0.12233000  |
| H  | 4.83893200  | 4.80419300  | 0.44502300  |
